# Supplementary material
Source: publisher figshare collection journal article supplement (https://future-science-group.figshare.com/ndownloader/files/31280872)
Supplement: Supplementary file 1 [file 31280872]

**Supplementary Material**

Structure-activity relationships of Schiff bases derived from diaminomaleonitrile as new potential agents for the treatment of Chagas disease

Authors

Affiliations

Table Index

[Table S1. Principal IR Frequencies and tentative assignments for all Schiff bases. 3](#_Toc70340464)

[Table S2. Experimental and KPLS-predicted pIC50 values for the Schiff bases. 41](#_Toc70340465)

Figure Index

[Figure S1. Infrared Spectra (CsI - 4000-240 cm-1) for **1**. 4](#_Toc79780096)

[Figure S2. Infrared Spectra (CsI - 4000-240 cm-1) for **2**. 4](#_Toc79780097)

[Figure S3. Infrared Spectra (CsI - 4000-240 cm-1) for **3**. 5](#_Toc79780098)

[Figure S4. Infrared Spectra (CsI - 4000-240 cm-1) for **4.** 5](#_Toc79780099)

[Figure S5. Infrared Spectra (CsI - 4000-240 cm-1) for **5**. 5](#_Toc79780100)

[Figure S6. Infrared Spectra (CsI - 4000-240 cm-1) for **6**. 6](#_Toc79780101)

[Figure S7. Infrared Spectra (CsI - 4000-240 cm-1) for **7**. 6](#_Toc79780102)

[Figure S8. Infrared Spectra (CsI - 4000-240 cm-1) for **8** 6](#_Toc79780103)

[Figure S9. Infrared Spectra (CsI - 4000-240 cm-1) for **9**. 7](#_Toc79780104)

[Figure S10. Infrared Spectra (CsI - 4000-240 cm-1) for **10**. 7](#_Toc79780105)

[Figure S11. Infrared Spectra (CsI - 4000-240 cm-1) for **11**. 7](#_Toc79780106)

[Figure S12. Infrared Spectra (CsI - 4000-240 cm-1) for **12**. 8](#_Toc79780107)

[Figure S13. Infrared Spectra (CsI - 4000-240 cm-1) for **13**. 8](#_Toc79780108)

[Figure S14. Infrared Spectra (CsI - 4000-240 cm-1) for **14**. 8](#_Toc79780109)

[Figure S15. Infrared Spectra (CsI - 4000-240 cm-1) for **15**. 9](#_Toc79780110)

[Figure S16. Infrared Spectra (CsI - 4000-240 cm-1) for **16**. 9](#_Toc79780111)

[Figure S17. Infrared Spectra (CsI - 4000-240 cm-1) for **17**. 9](#_Toc79780112)

[Figure S18. Infrared Spectra (CsI - 4000-240 cm-1) for **18**. 10](#_Toc79780113)

[Figure S19. Infrared Spectra (CsI - 4000-240 cm-1) for **19**. 10](#_Toc79780114)

[Figure S20. Infrared Spectra (CsI - 4000-240 cm-1) for **20**. 10](#_Toc79780115)

[Figure S21. Infrared Spectra (CsI - 4000-240 cm-1) for **21**. 11](#_Toc79780116)

[Figure S22. Infrared Spectra (CsI - 4000-240 cm-1) for **22**. 11](#_Toc79780117)

[Figure S23. Infrared Spectra (CsI - 4000-240 cm-1) for **23**. 11](#_Toc79780118)

[Figure S24. Infrared Spectra (CsI - 4000-240 cm-1) for **24**. 12](#_Toc79780119)

[Figure S25. Infrared Spectra (CsI - 4000-240 cm-1) for **25** 12](#_Toc79780120)

[Figure S26. Infrared Spectra (CsI - 4000-240 cm-1) for **26**. 12](#_Toc79780121)

[Figure S27. Infrared Spectra (CsI - 4000-240 cm-1) for **27**. 13](#_Toc79780122)

[Figure S28. 1H NMR spectrum (400 MHz, DMSO-d6) of **1**. 13](#_Toc79780123)

[Figure S29. 13C NMR spectrum (100 MHz, DMSO-d6) of **1**. 14](#_Toc79780124)

[Figure S30. 1H NMR spectrum (400 MHz, DMSO-d6) of **2**. 15](#_Toc79780125)

[Figure S31. 13C NMR spectrum (100 MHz, DMSO-d6) of **2**. 15](#_Toc79780126)

[Figure S32. 1H NMR spectrum (400 MHz, DMSO-d6) of **3**. 16](#_Toc79780127)

[Figure S33. 13C NMR spectrum (100 MHz, DMSO-d6) of **3**. 16](#_Toc79780128)

[Figure S34. 1H NMR spectrum (400 MHz, DMSO-d6) of **4**. 17](#_Toc79780129)

[Figure S35. 13C NMR spectrum (100 MHz, DMSO-d6) of **4** 17](#_Toc79780130)

[Figure S36. 1H NMR spectrum (400 MHz, DMSO-d6) of **5**. 18](#_Toc79780131)

[Figure S37. 13C NMR spectrum (100 MHz, DMSO-d6) of **5**. 18](#_Toc79780132)

[Figure S38. 1H NMR spectrum (400 MHz, DMSO-d6) of **6**. 19](#_Toc79780133)

[Figure S39. 13C NMR spectrum (100 MHz, DMSO-d6) of **6**. 19](#_Toc79780134)

[Figure S40. 1H NMR spectrum (400 MHz, DMSO-d6) of **7** 20](#_Toc79780135)

[Figure S41. 3C NMR spectrum (100 MHz, DMSO-d6) of **7**. 20](#_Toc79780136)

[Figure S42. 1H NMR spectrum (400 MHz, DMSO-d6) of **8**. 21](#_Toc79780137)

[Figure S43. 13C NMR spectrum (100 MHz, DMSO-d6) of **8**. 21](#_Toc79780138)

[Figure S44. 1H NMR spectrum (400 MHz, DMSO-d6) of **9**. 22](#_Toc79780139)

[Figure S45. 13C NMR spectrum (100 MHz, DMSO-d6) of **9**. 22](#_Toc79780140)

[Figure S46. 1H NMR spectrum (400 MHz, DMSO-d6) of **10**. 23](#_Toc79780141)

[Figure S47. 13C NMR spectrum (100 MHz, DMSO-d6) of **10**. 23](#_Toc79780142)

[Figure S48. 1H NMR spectrum (400 MHz, DMSO-d6) of **11**. 24](#_Toc79780143)

[Figure S49. 13C NMR spectrum (100 MHz, DMSO-d6) of **11.** 24](#_Toc79780144)

[Figure S50. 1H NMR spectrum (400 MHz, DMSO-d6) of **12**. 25](#_Toc79780145)

[Figure S51. 13C NMR spectrum (100 MHz, DMSO-d6) of **12.** 25](#_Toc79780146)

[Figure S52. 1H NMR spectrum (400 MHz, DMSO-d6) of **13** 26](#_Toc79780147)

[Figure S53. 13C NMR spectrum (100 MHz, DMSO-d6) of **13** 26](#_Toc79780148)

[Figure S54. 1H NMR spectrum (400 MHz, DMSO-d6) of **14** 27](#_Toc79780149)

[Figure S55. 13C NMR spectrum (100 MHz, DMSO-d6) of **14** 27](#_Toc79780150)

[Figure S56. 1H NMR spectrum (400 MHz, DMSO-d6) of **15** 28](#_Toc79780151)

[Figure S57. 13C NMR spectrum (100 MHz, DMSO-d6) of **15** 28](#_Toc79780152)

[Figure S58. 1H NMR spectrum (400 MHz, DMSO-d6) of **16** 29](#_Toc79780153)

[Figure S59. 13C NMR spectrum (100 MHz, DMSO-d6) of **16** 29](#_Toc79780154)

[Figure S60. 1H NMR spectrum (400 MHz, DMSO-d6) of **17** 30](#_Toc79780155)

[FigureS 61. 13C NMR spectrum (100 MHz, DMSO-d6) of **17** 30](#_Toc79780156)

[Figure S62. 1H NMR spectrum (400 MHz, DMSO-d6) of **18** 31](#_Toc79780157)

[Figure S63. 13C NMR spectrum (100 MHz, DMSO-d6) of **18** 31](#_Toc79780158)

[Figure S64. 1H NMR spectrum (400 MHz, DMSO-d6) of **19** 32](#_Toc79780159)

[Figure S65. 13C NMR spectrum (100 MHz, DMSO-d6) of **19** 32](#_Toc79780160)

[Figure S66. 1H NMR spectrum (400 MHz, DMSO-d6) of **20** 33](#_Toc79780161)

[Figure S67. 13C NMR spectrum (100 MHz, DMSO-d6) of **20** 33](#_Toc79780162)

[Figure S68. 1H NMR spectrum (400 MHz, DMSO-d6) of **21** 34](#_Toc79780163)

[Figure S69. 13C NMR spectrum (100 MHz, DMSO-d6) of **21** 34](#_Toc79780164)

[Figure S70. 1H NMR spectrum (400 MHz, DMSO-d6) of **22**. 35](#_Toc79780165)

[Figure S71. 13C NMR spectrum (100 MHz, DMSO-d6) of **22**. 35](#_Toc79780166)

[Figure S72. 1H NMR spectrum (400 MHz, DMSO-d6) of **23** 36](#_Toc79780167)

[Figure S73. 13C NMR spectrum (100 MHz, DMSO-d6) of **23**. 36](#_Toc79780168)

[Figure S74. 1H NMR spectrum (400 MHz, DMSO-d6) of **24**. 37](#_Toc79780169)

[Figure S75. 13C NMR spectrum (100 MHz, DMSO-d6) of **24**. 37](#_Toc79780170)

[Figure S76. 1H NMR spectrum (400 MHz, DMSO-d6) of **25** 38](#_Toc79780171)

[Figure S77. 13C NMR spectrum (100 MHz, DMSO-d6) of **25** 38](#_Toc79780172)

[Figure S78. 1H NMR spectrum (400 MHz, DMSO-d6) of **26**. 39](#_Toc79780173)

[Figure S79. 13C NMR spectrum (100 MHz, DMSO-d6) of **26** 39](#_Toc79780174)

[Figure S80. 1H NMR spectrum (400 MHz, DMSO-d6) of **27**. 40](#_Toc79780175)

[Figure S81. 13C NMR spectrum (100 MHz, DMSO-d6) of **27** 40](#_Toc79780176)

Table S1. Principal IR Frequencies and tentative assignments for all Schiff bases.

|  | **νasNH2** | **νsNH2** | **νOH** | **νC≡N** | **νC=N** | **νC=C** | **νC-N** | **νC-O** |
| --- | --- | --- | --- | --- | --- | --- | --- | --- |
| **1** | 3418 | 3310 | 3194 | 2235  2206 | 1635 | 1601 | 1467 | 1383 |
| **2** | 3451 | 3206 | 3434  3200 | 2233  2219 | 1635 | 1612 | 1456 | 1385  1371 |
| **3** | 3405 | 3310 | 3371  3213 | 2239  2212 | 1635  1627 | 1606 | 1462 | 1378 |
| **4** | 3458 | 3337 | 3193 | 2244  2218 | 1625 | 1600 | 1497 | 1378 |
| **5** | 3410 | 3325 | 3235 | 2246  2205 | 1645 | 1602 | 1471 | 1386  1388 |
| **6** | 3402 | 3311 | 3203 | 2238  2211 | 1624 | 1602 | 1505 | 1380 |
| **7** | 3464 | 3340 | 3193 | 2246  2205 | 1634  1615 | 1599 | 1496 | 1374  1364 |
| **8** | 3490 | 3349 | 3173 | 2235  2203 | 1614 | 1602 | 1464 | 1384 |
| **9** | 3419 | 3317 | 3206 | 2231  2206 | 1634 | 1596 | 1474 | 1369 |
| **10** | 3458 | 3337 | 3200 | 2238  2209 | 1626 | 1607 | 1435 | 1380 |
| **11** | 3411 | 3314 | 3209 | 2242  2213 | 1628 | 1600 | 1490 | 1379 |
| **12** | 3438 | 3330 | 3222 | 2249  2203 | 1625 | 1604 | 1429 | 1384 |
| **13** | 3465 | 3350 | 3192 | 2245  2209 | 1626 | 1607 | 1435 | 1380 |
| **14** | 3416 | 3312 | 3207 | 2248  2209 | 1626 | 1605 | 1478 | 1391 |
| **15** | 3416 | 3312 | 3207 | 2248  2209 | 1626 | 1605 | 1478 | 1391 |
| **16** | 3492 | 3332 | 3182 | 2237  2208 | 1614 | 1602 | 1441 | 1380 |
| **17** | 3406 | 3305 | 3201 | 2249  2211 | 1633 | 1602 | 1480 | 1392 |
| **18** | 3491 | 3330 | 3184 | 2237  2207 | 1616 | 1600 | 1438 | 1379 |
| **19** | 3407 | 3313 | 3198 | 2244  2211 | 1630  1612 | 1599 | 1481 | 1388  1373 |
| **20** | 3407 | 3305 | 3200 | 2248  2211 | 1632 | 1602 | 1476 | 1391 |
| **21** | 3406 | 3303 | 3200 | 2248  2212 | 1632 | 1598 | 1472 | 1389 |
| **22** | 3402 | 3306 | 3201 | 2249  2215 | 1635 | 1600 | 1428 | 1392 |
| **23** | 3411 | 3308 | 3206 | 2250  2210 | 1629 | 1602 | 1453 | 1390 |
| **24** | 3417 | 3319 | 3210 | 2242  2213 | 1630 | 1602 | 1485 | 1388 |
| **25** | 3413 | 3310 | 3208 | 2249  2212 | 1632 | 1600 | 1487 | 1388  1370 |
| **26** | 3444 | 3307 | 3216 | 2240  2220 | 1634 | 1608 | 1479 | 1389 |
| **27** | 3410 | 3307 | 3216 | 2240  2220 | 1634  1626 | 1608; | 1479 | 1389 |

Figure S1. Infrared Spectra (CsI - 4000-240 cm-1) for **1**.

Figure S2. Infrared Spectra (CsI - 4000-240 cm-1) for **2**.

Figure S3. Infrared Spectra (CsI - 4000-240 cm-1) for **3**.

Figure S4. Infrared Spectra (CsI - 4000-240 cm-1) for **4.**

Figure S5. Infrared Spectra (CsI - 4000-240 cm-1) for **5**.

Figure S6. Infrared Spectra (CsI - 4000-240 cm-1) for **6**.

Figure S7. Infrared Spectra (CsI - 4000-240 cm-1) for **7**.

Figure S8. Infrared Spectra (CsI - 4000-240 cm-1) for **8**

Figure S9. Infrared Spectra (CsI - 4000-240 cm-1) for **9**.

Figure S10. Infrared Spectra (CsI - 4000-240 cm-1) for **10**.

Figure S11. Infrared Spectra (CsI - 4000-240 cm-1) for **11**.

Figure S12. Infrared Spectra (CsI - 4000-240 cm-1) for **12**.

Figure S13. Infrared Spectra (CsI - 4000-240 cm-1) for **13**.

Figure S14. Infrared Spectra (CsI - 4000-240 cm-1) for **14**.

Figure S15. Infrared Spectra (CsI - 4000-240 cm-1) for **15**.

Figure S16. Infrared Spectra (CsI - 4000-240 cm-1) for **16**.

Figure S17. Infrared Spectra (CsI - 4000-240 cm-1) for **17**.

Figure S18. Infrared Spectra (CsI - 4000-240 cm-1) for **18**.

Figure S19. Infrared Spectra (CsI - 4000-240 cm-1) for **19**.

Figure S20. Infrared Spectra (CsI - 4000-240 cm-1) for **20**.

Figure S21. Infrared Spectra (CsI - 4000-240 cm-1) for **21**.

Figure S22. Infrared Spectra (CsI - 4000-240 cm-1) for **22**.

Figure S23. Infrared Spectra (CsI - 4000-240 cm-1) for **23**.

Figure S24. Infrared Spectra (CsI - 4000-240 cm-1) for **24**.

Figure S25. Infrared Spectra (CsI - 4000-240 cm-1) for **25**

Figure S26. Infrared Spectra (CsI - 4000-240 cm-1) for **26**.

Figure S27. Infrared Spectra (CsI - 4000-240 cm-1) for **27**.

Figure S28. 1H NMR spectrum (400 MHz, DMSO-d6) of **1**.

Figure S29. 13C NMR spectrum (100 MHz, DMSO-d6) of **1**.

Figure S30. 1H NMR spectrum (400 MHz, DMSO-d6) of **2**.

Figure S31. 13C NMR spectrum (100 MHz, DMSO-d6) of **2**.

Figure S32. 1H NMR spectrum (400 MHz, DMSO-d6) of **3**.

Figure S33. 13C NMR spectrum (100 MHz, DMSO-d6) of **3**.

Figure S34. 1H NMR spectrum (400 MHz, DMSO-d6) of **4**.

Figure S35. 13C NMR spectrum (100 MHz, DMSO-d6) of **4**

Figure S36. 1H NMR spectrum (400 MHz, DMSO-d6) of **5**.

Figure S37. 13C NMR spectrum (100 MHz, DMSO-d6) of **5**.

Figure S38. 1H NMR spectrum (400 MHz, DMSO-d6) of **6**.

Figure S39. 13C NMR spectrum (100 MHz, DMSO-d6) of **6**.

Figure S40. 1H NMR spectrum (400 MHz, DMSO-d6) of **7**

Figure S41. 3C NMR spectrum (100 MHz, DMSO-d6) of **7**.

Figure S42. 1H NMR spectrum (400 MHz, DMSO-d6) of **8**.

Figure S43. 13C NMR spectrum (100 MHz, DMSO-d6) of **8**.

Figure S44. 1H NMR spectrum (400 MHz, DMSO-d6) of **9**.

Figure S45. 13C NMR spectrum (100 MHz, DMSO-d6) of **9**.

Figure S46. 1H NMR spectrum (400 MHz, DMSO-d6) of **10**.

Figure S47. 13C NMR spectrum (100 MHz, DMSO-d6) of **10**.

Figure S48. 1H NMR spectrum (400 MHz, DMSO-d6) of **11**.

Figure S49. 13C NMR spectrum (100 MHz, DMSO-d6) of **11.**

Figure S50. 1H NMR spectrum (400 MHz, DMSO-d6) of **12**.

Figure S51. 13C NMR spectrum (100 MHz, DMSO-d6) of **12.**

Figure S52. 1H NMR spectrum (400 MHz, DMSO-d6) of **13**

Figure S53. 13C NMR spectrum (100 MHz, DMSO-d6) of **13**

Figure S54. 1H NMR spectrum (400 MHz, DMSO-d6) of **14**

Figure S55. 13C NMR spectrum (100 MHz, DMSO-d6) of **14**

Figure S56. 1H NMR spectrum (400 MHz, DMSO-d6) of **15**

Figure S57. 13C NMR spectrum (100 MHz, DMSO-d6) of **15**

Figure S58. 1H NMR spectrum (400 MHz, DMSO-d6) of **16**

Figure S59. 13C NMR spectrum (100 MHz, DMSO-d6) of **16**

Figure S60. 1H NMR spectrum (400 MHz, DMSO-d6) of **17**

FigureS 61. 13C NMR spectrum (100 MHz, DMSO-d6) of **17**

Figure S62. 1H NMR spectrum (400 MHz, DMSO-d6) of **18**

Figure S63. 13C NMR spectrum (100 MHz, DMSO-d6) of **18**

Figure S64. 1H NMR spectrum (400 MHz, DMSO-d6) of **19**

Figure S65. 13C NMR spectrum (100 MHz, DMSO-d6) of **19**

Figure S66. 1H NMR spectrum (400 MHz, DMSO-d6) of **20**

Figure S67. 13C NMR spectrum (100 MHz, DMSO-d6) of **20**

Figure S68. 1H NMR spectrum (400 MHz, DMSO-d6) of **21**

Figure S69. 13C NMR spectrum (100 MHz, DMSO-d6) of **21**

Figure S70. 1H NMR spectrum (400 MHz, DMSO-d6) of **22**.

Figure S71. 13C NMR spectrum (100 MHz, DMSO-d6) of **22**.

Figure S72. 1H NMR spectrum (400 MHz, DMSO-d6) of **23**

Figure S73. 13C NMR spectrum (100 MHz, DMSO-d6) of **23**.

Figure S74. 1H NMR spectrum (400 MHz, DMSO-d6) of **24**.

Figure S75. 13C NMR spectrum (100 MHz, DMSO-d6) of **24**.

Figure S76. 1H NMR spectrum (400 MHz, DMSO-d6) of **25**

Figure S77. 13C NMR spectrum (100 MHz, DMSO-d6) of **25**

Figure S78. 1H NMR spectrum (400 MHz, DMSO-d6) of **26**.

Figure S79. 13C NMR spectrum (100 MHz, DMSO-d6) of **26**

Figure S80. 1H NMR spectrum (400 MHz, DMSO-d6) of **27**.

Figure S81. 13C NMR spectrum (100 MHz, DMSO-d6) of **27**

Table S2. Experimental and KPLS-predicted pIC50 values for the Schiff bases.

| **Compound** | **Experimental pIC50** | **Predicted pIC50** | **Compound** | **Experimental pIC50** | **Predicted pIC50** |
| --- | --- | --- | --- | --- | --- |
| 1 | 4.657 | 4.613 | 15 | 4.547 | 4.582 |
| 2 | 4.962 | 4.863 | 16 | 5.183 | 5.092 |
| 3 | 4.731 | 4.724 | 17 | 4.815 | 4.954 |
| 4 | 4.962 | 4.976 | 18 | 5.199 | 4.905 |
| 5 | 4.525 | 4.658 | 19 | 4.631 | 4.572 |
| 6 | 4.538 | 4.383 | 20 | 4.834 | 4.830 |
| 7 | 4.494 | 4.503 | 21 | 4.813 | 4.915 |
| 8 | 4.612 | 4.658 | 22 | 4.338 | 4.235 |
| 9 | 6.167 | 5.688 | 23 | 4.798 | 4.636 |
| 10 | 5.573 | 5.568 | 24 | 4.323 | 4.355 |
| 11 | 4.731 | 5.172 | 25 | 4.464 | 4.703 |
| 12 | 4.723 | 5.345 | 26 | 5.086 | 4.973 |
| 13 | 6.580 | 6.454 | 27 | 4.813 | 4.817 |
| 14 | 4.563 | 4.524 |  |  |  |
